# Supplementary material for: Synthesis and biological evaluation of stilbene derivatives coupled to NO donors as potential antidiabetic agents
Source: PubMed Central journal article supplement (PMC7011920; doi:10.1080/14756366.2018.1425686), 2018-01-29

# Synthesis, and biological evaluation of stilbene derivatives coupled to NO donors as potential antidiabetic agents

**Bing Wang,<sup>1,2,3,4</sup> Teng Liu,<sup>1,2,3,4</sup> Zhongyu Wu,<sup>1,2,3,4</sup> Lei Zhang,<sup>1,2,3,4</sup> Jie Sun,<sup>1,2,3,4\*</sup> and Xiaojing Wang<sup>1,2,3,4\*</sup>**

<sup>1</sup> School of Medicine and Life Sciences, University of Jinan-Shandong Academy of Medical Sciences, Jinan 250200, Shandong, China

<sup>2</sup> Institute of MateriaMedica, Shandong Academy of Medical Sciences, Jinan 250062, Shandong, China

<sup>3</sup> Key Laboratory for Biotech-Drugs Ministry of Health, Jinan 250062, Shandong, China

<sup>4</sup> Key Laboratory for Rare & Uncommon Diseases of Shandong Province, Jinan 250062, Shandong, China

\*Corresponding authors: E-Mail:

E-Mail: [sunjie310@126.com](mailto:sunjie310@126.com) (J. Sun)

E-Mail: [xiaojing6@gmail.com](mailto:xiaojing6@gmail.com) (X. Wang)

## Supporting Information

### Contents

|                                                                            |    |
|----------------------------------------------------------------------------|----|
| IR(KBr) of compounds 3a-7c .....                                           | 2  |
| HPLC spectra of compounds 3a-7c .....                                      | 6  |
| Mass spectrum of compounds 3a-7c.....                                      | 10 |
| <sup>1</sup> H NMR(600 MHz, DMSO-d <sub>6</sub> ) of compounds 3a-7c.....  | 15 |
| <sup>13</sup> C NMR(150 MHz, DMSO-d <sub>6</sub> ) of compounds 3a-7c..... | 19 |

# IR(KBr) of compounds 3a-7c

3a

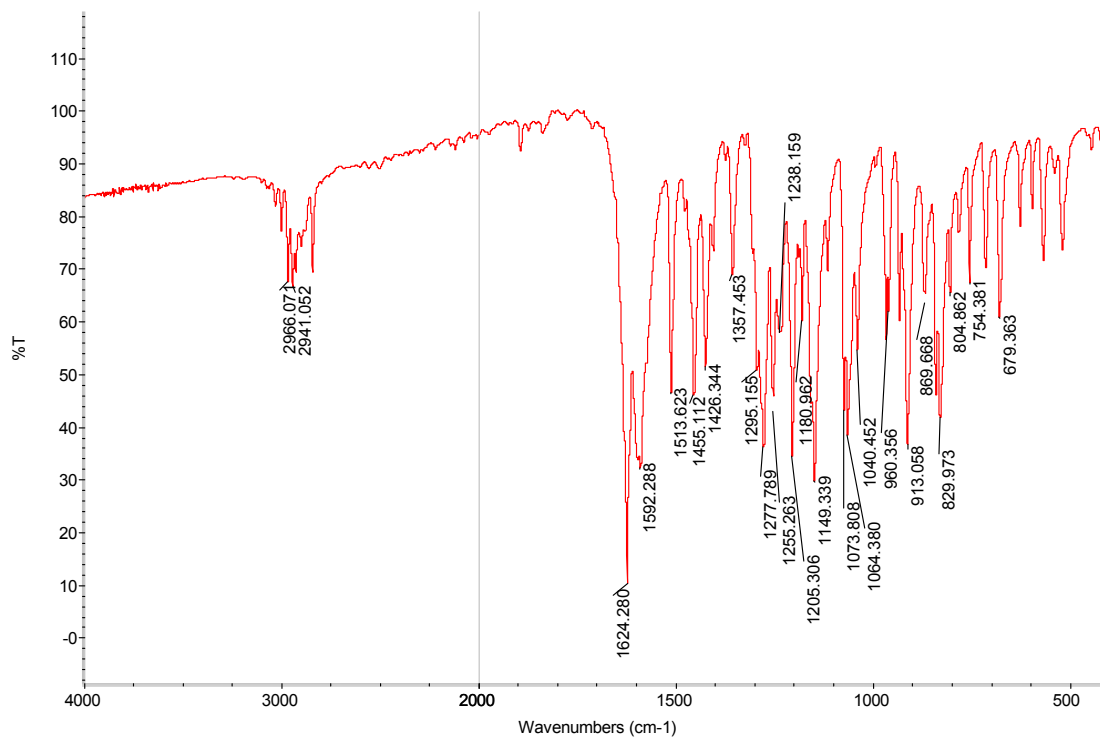

3b

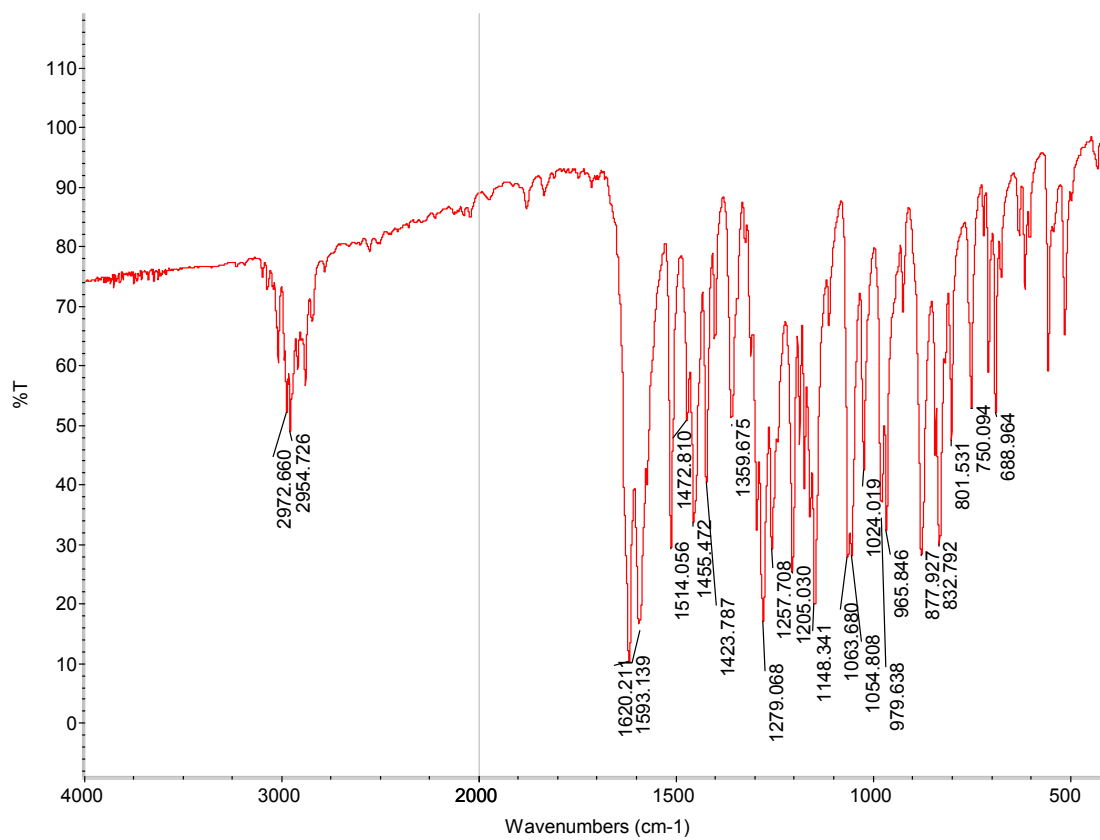

3c

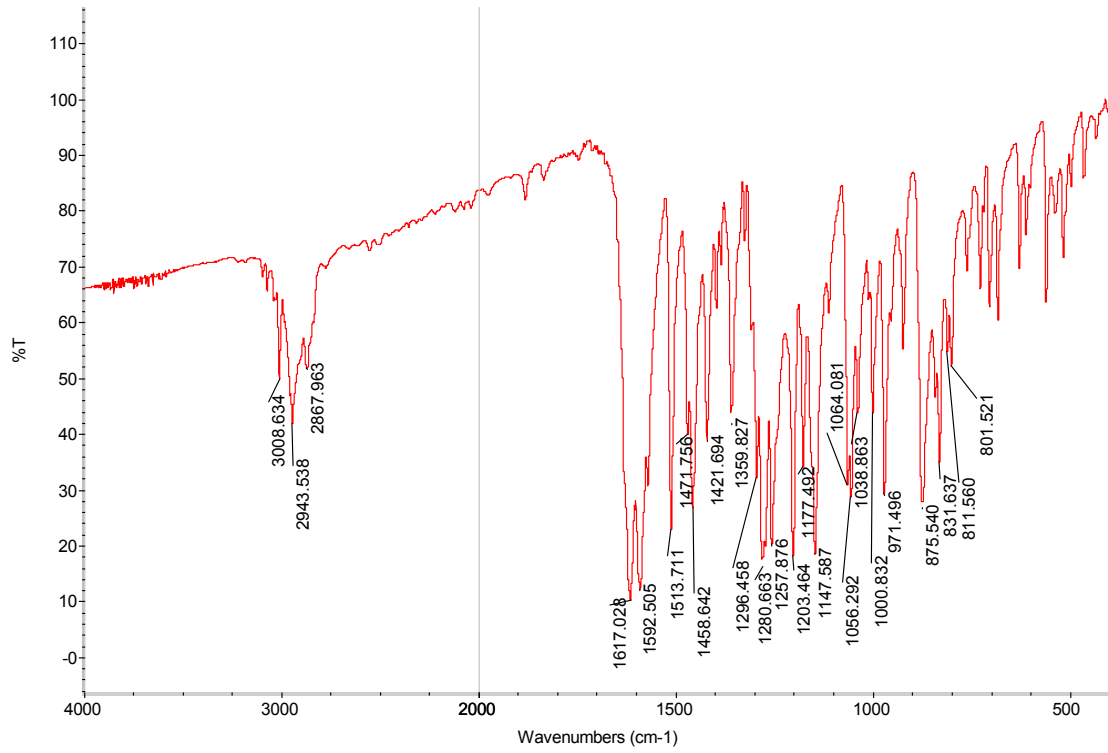

3d

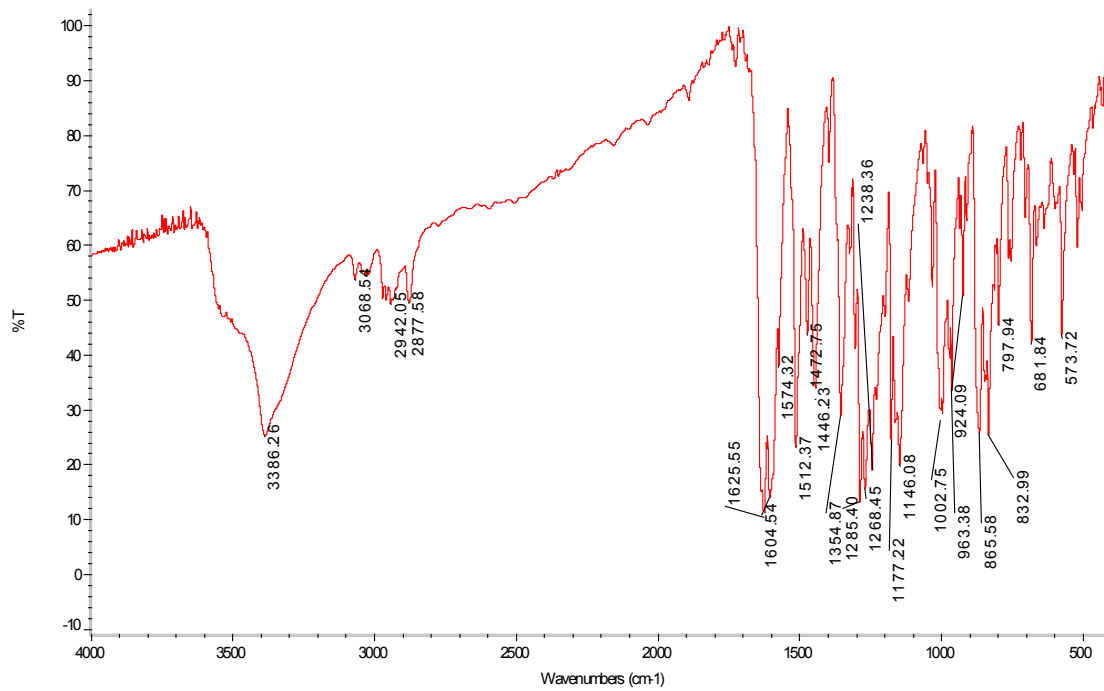

3e

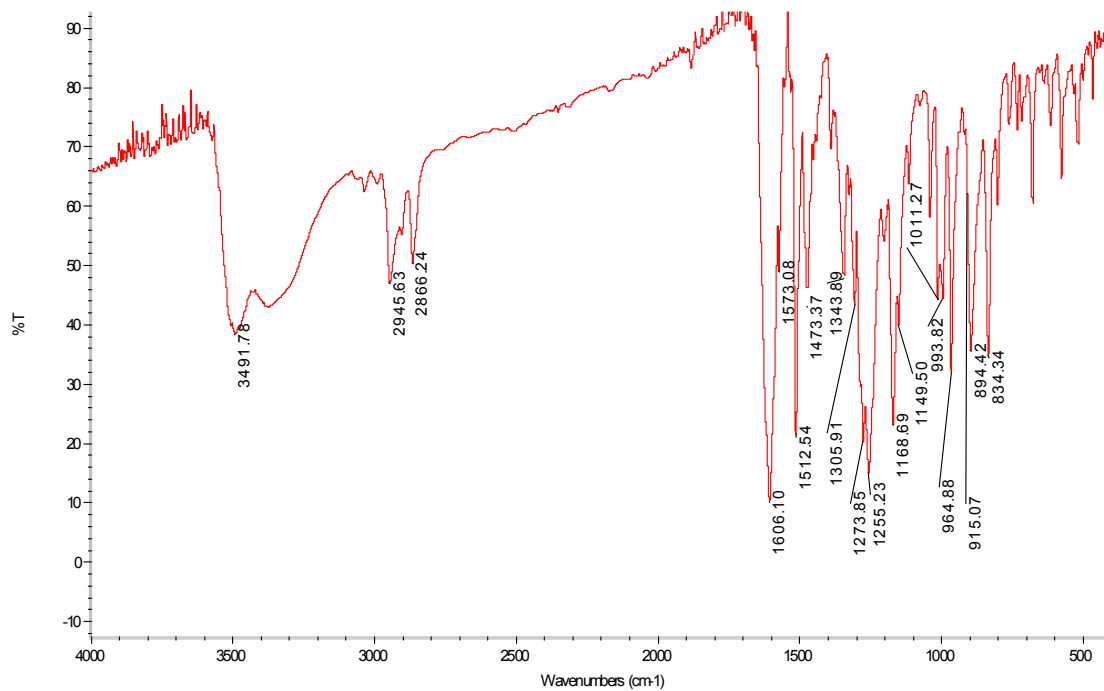

7a

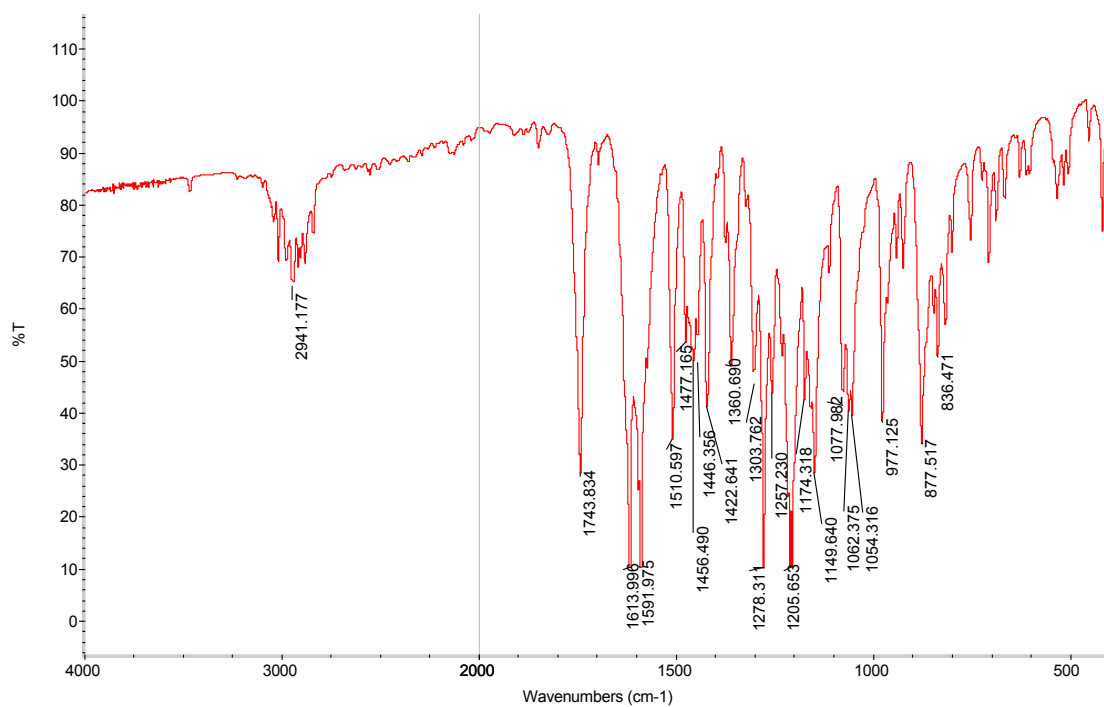

7b

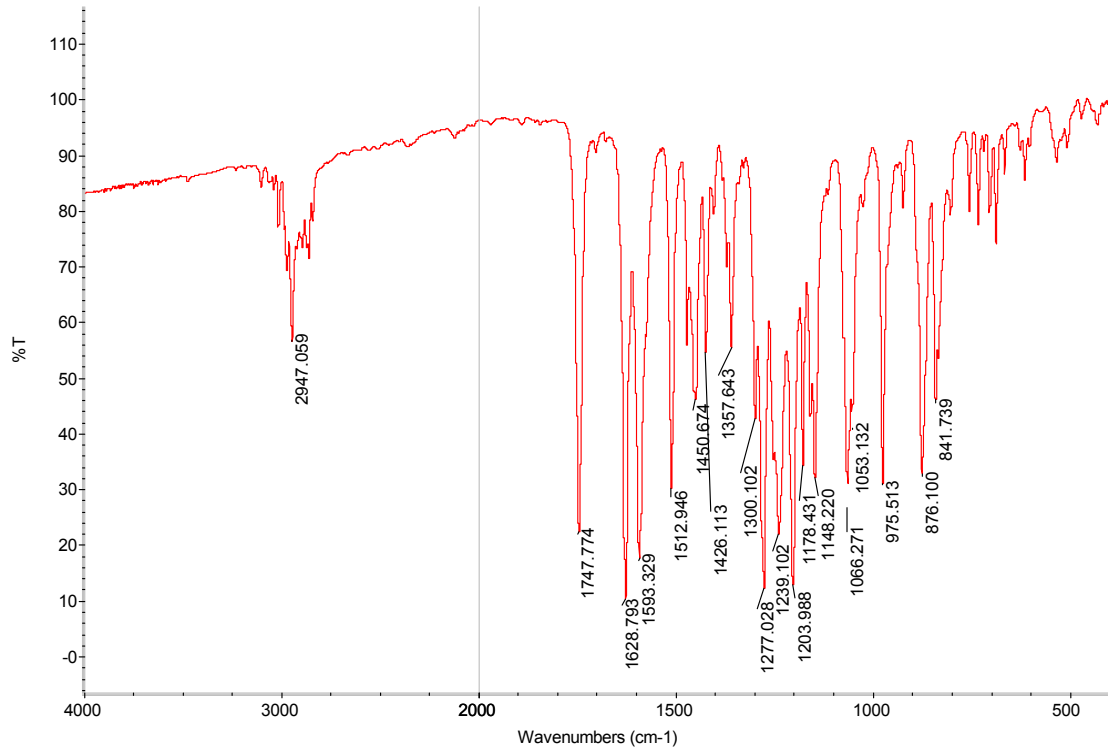

7c

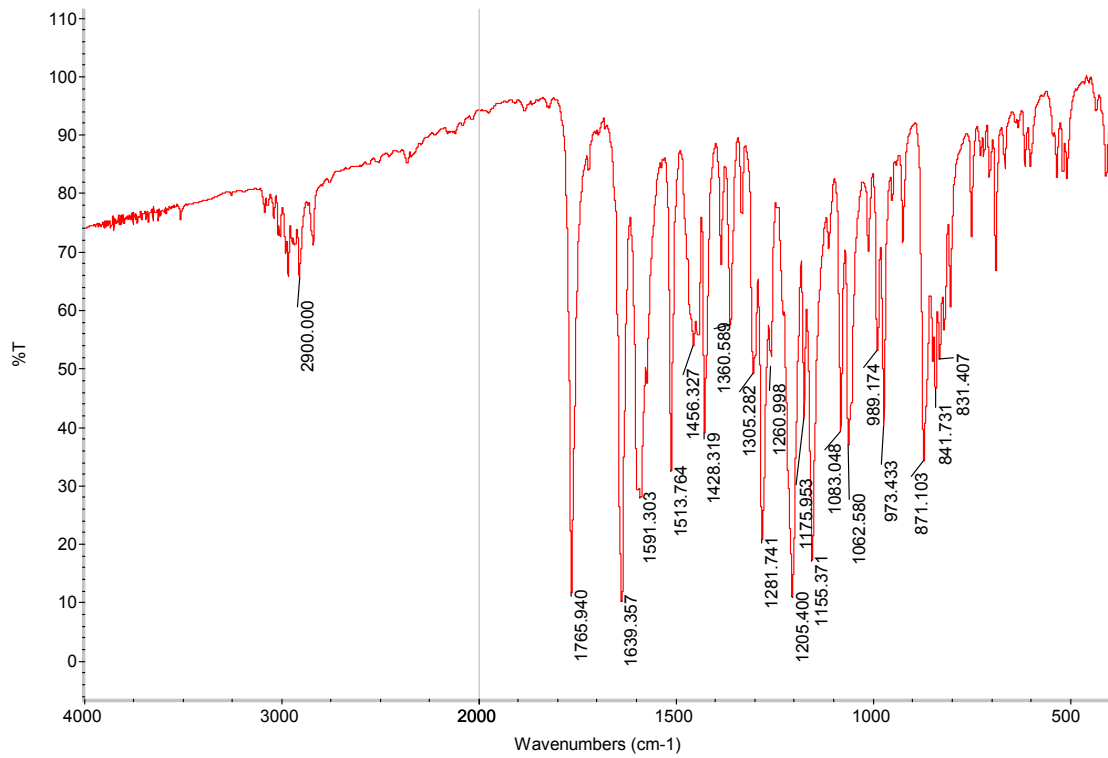

## HPLC spectra of compounds 3a-7c

Specify methods used: Instrument: Agilent 1100;

Column: Agilent SB-C18, 30 x 2.1 mm, 3.5  $\mu$ m;

Detector: DAD detector, 254 nm;

Flow rate: 1 ml / min

Mobile phase: methanol: water (0.1% glacial acetic acid); gradient elution

Injection volume: 5  $\mu$ l

Temperature: 25  $^{\circ}$  C

Spectra without purity table means that the purity is close to 100%.

**3a**

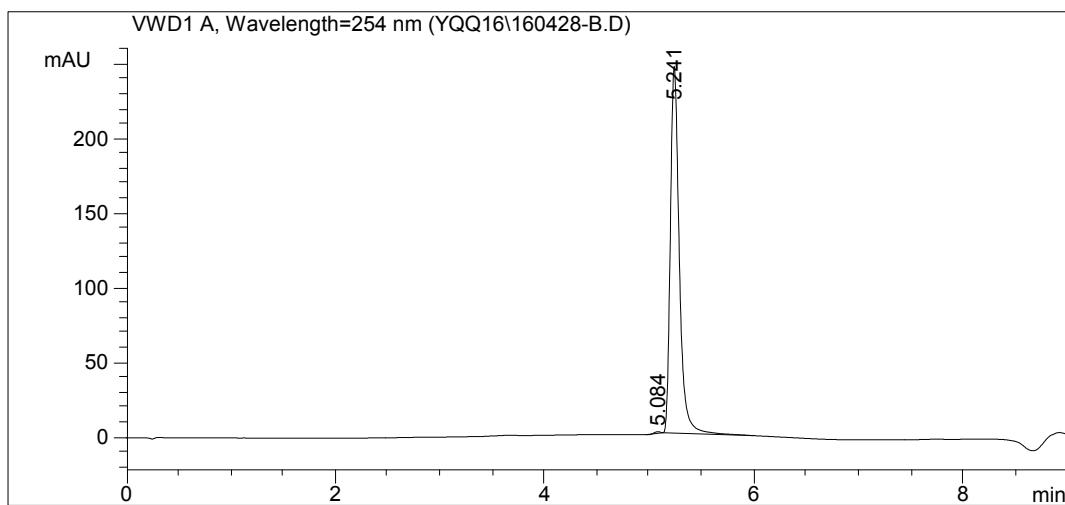

| # | Meas. Ret. Time | Main Peak Height | Main Peak Area | Main Peak Area % |
|---|-----------------|------------------|----------------|------------------|
| 1 | 5.084           | 1.126            | 3.856          | 0.262            |
| 2 | 5.241           | 245.901          | 1464.061       | 99.737           |

**3b**

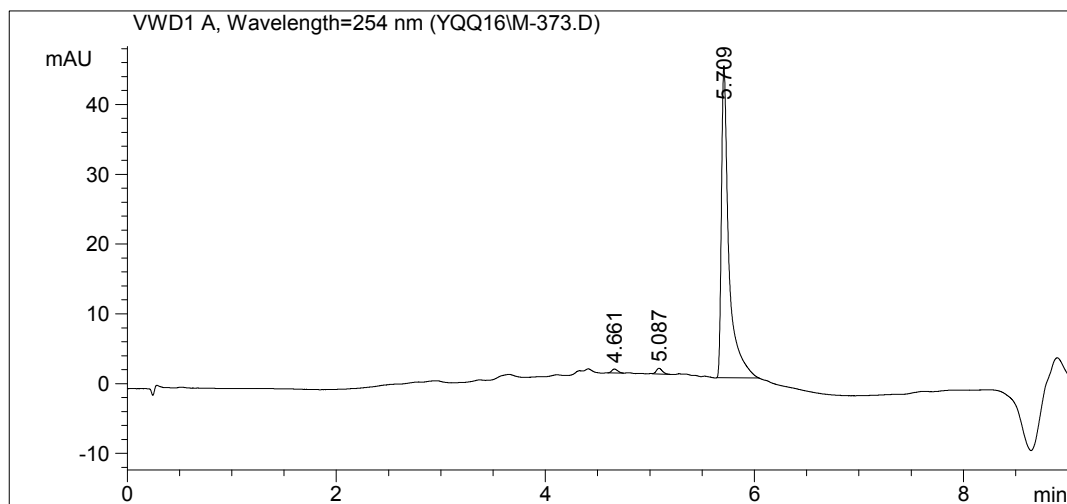

| # | Meas. Ret. Time | Main Peak Height | Main Peak Area | Main Peak Area % |
|---|-----------------|------------------|----------------|------------------|
| 1 | 4.661           | 0.570            | 2.222          | 0.973            |
| 2 | 5.087           | 0.830            | 3.364          | 1.472            |
| 3 | 5.709           | 44.707           | 222.807        | 97.554           |

3c

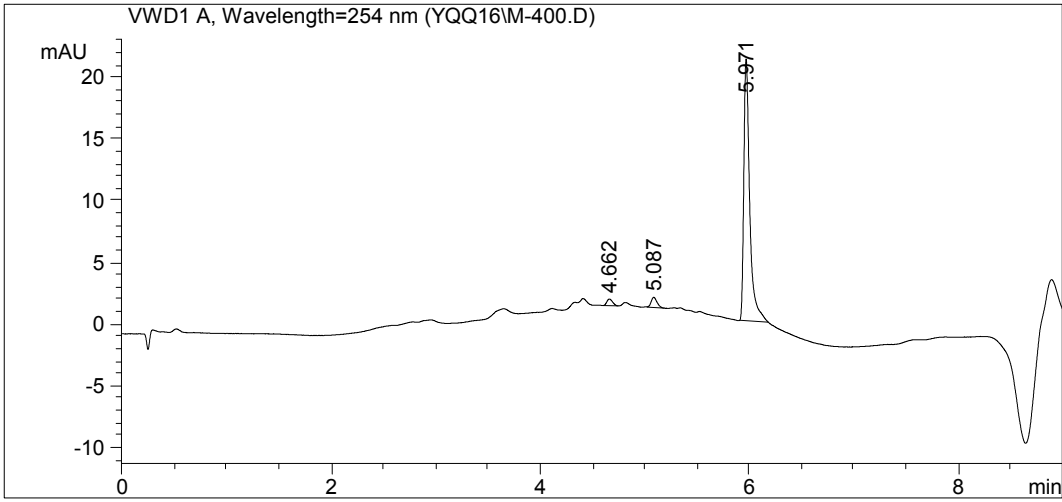

| # | Meas. Ret. Time | Main Peak Height | Main Peak Area | Main Peak Area % |
|---|-----------------|------------------|----------------|------------------|
| 1 | 4.662           | 0.570            | 2.222          | 0.973            |
| 2 | 5.087           | 0.830            | 3.364          | 1.472            |
| 3 | 5.971           | 44.707           | 222.807        | 97.554           |

3d

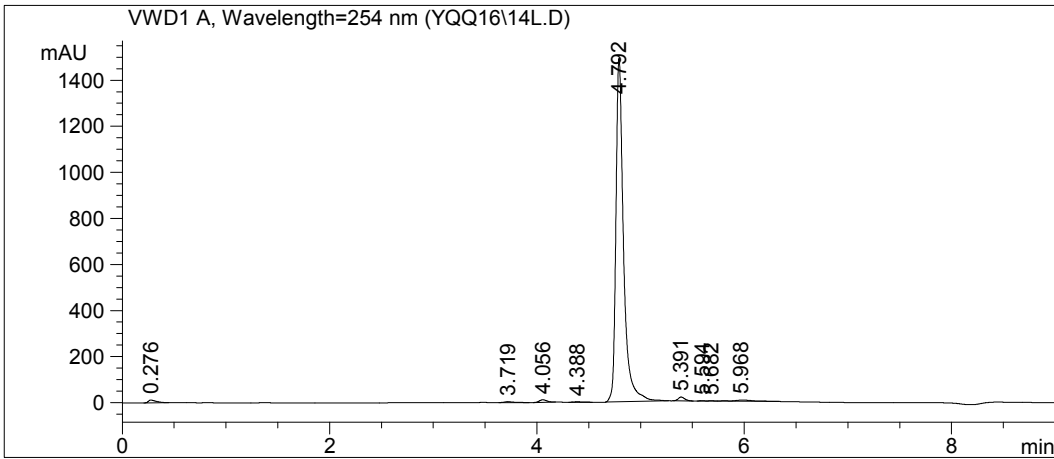

| # | Meas. Ret. Time | Main Peak Height | Main Peak Area | Main Peak Area % |
|---|-----------------|------------------|----------------|------------------|
| 1 | 0.276           | 12.486           | 63.275         | 0.794            |
| 2 | 3.719           | 3.917            | 25.006         | 0.313            |
| 3 | 4.056           | 11.271           | 56.760         | 0.712            |
| 4 | 4.388           | 2.031            | 11.980         | 0.150            |
| 5 | 4.792           | 1492.323         | 7663.139       | 96.196           |
| 6 | 5.391           | 16.904           | 73.912         | 0.927            |
| 7 | 5.594           | 0.744            | 1.940          | 0.024            |
| 8 | 5.682           | 1.145            | 3.323          | 0.041            |
| 9 | 5.968           | 4.525            | 66.782         | 0.838            |

3e

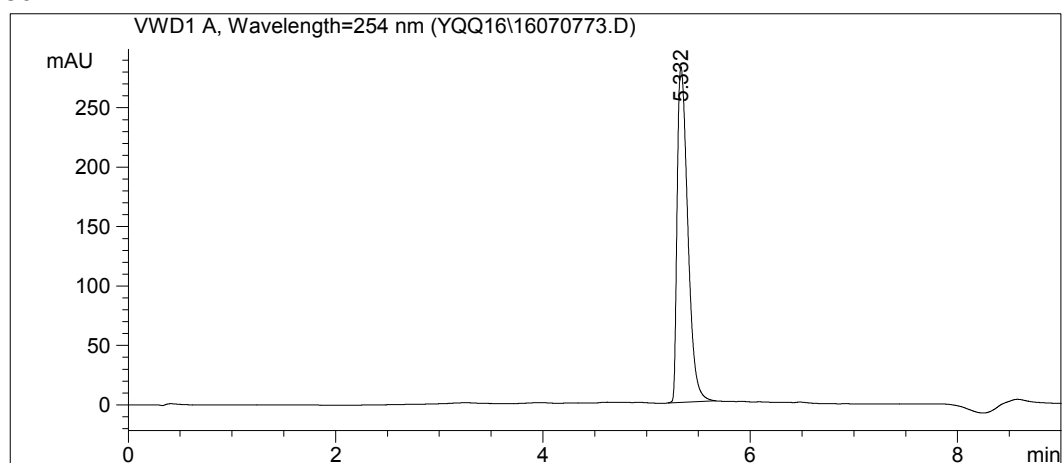

This means that the purity is close to 100%.

7a

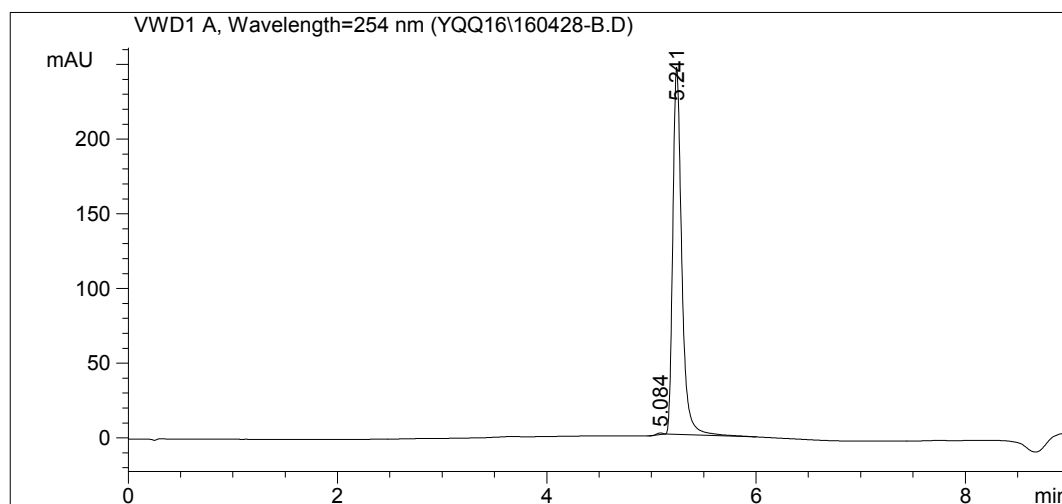

| # | Meas. Ret. Time | Main Peak Height | Main Peak Area | Main Peak Area % |
|---|-----------------|------------------|----------------|------------------|
| 1 | 5.084           | 1.126            | 3.856          | 0.262            |
| 2 | 5.241           | 245.901          | 1464.061       | 99.737           |

7b



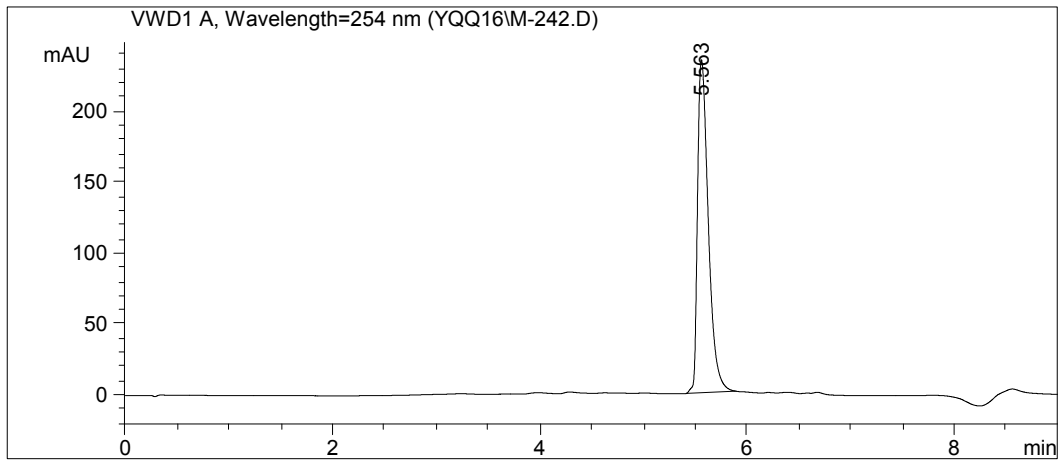

This means that the purity is close to 100%.

7c

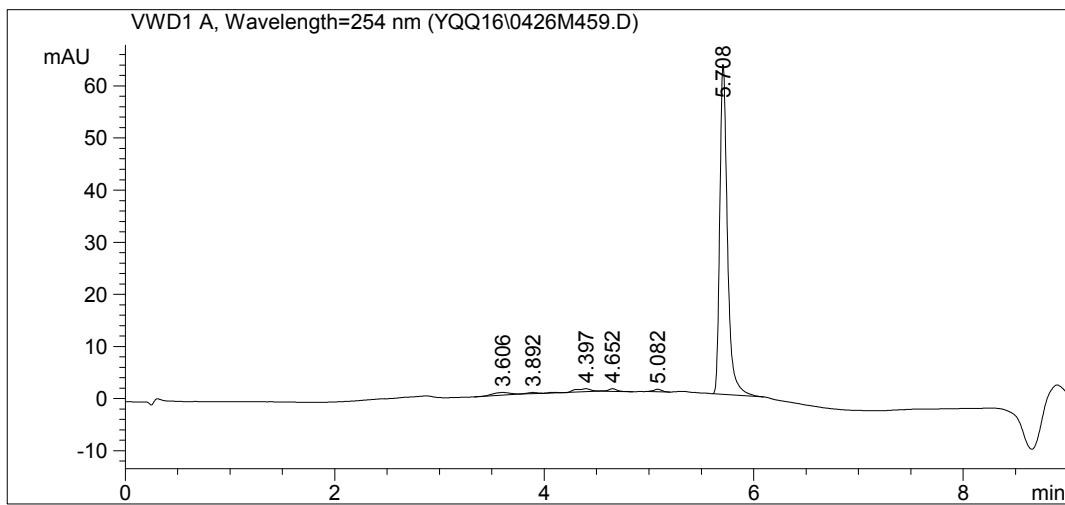

| # | Meas. Ret. Time | Main Peak Height | Main Peak Area | Main Peak Area % |
|---|-----------------|------------------|----------------|------------------|
| 1 | 3.606           | 0.486            | 5.667          | 1.667            |
| 2 | 3.892           | 0.198            | 1.271          | 0.373            |
| 3 | 4.397           | 0.536            | 5.568          | 1.638            |
| 4 | 4.652           | 0.504            | 2.979          | 0.876            |
| 5 | 5.082           | 0.474            | 2.570          | 0.756            |
| 6 | 5.708           | 63.319           | 321.843        | 94.688           |

# Mass spectrum of compounds 3a-7c

3a

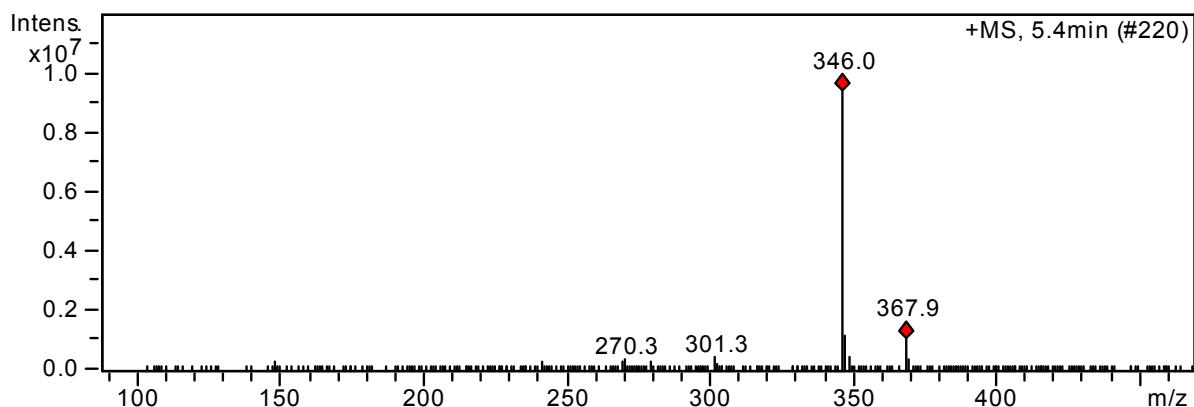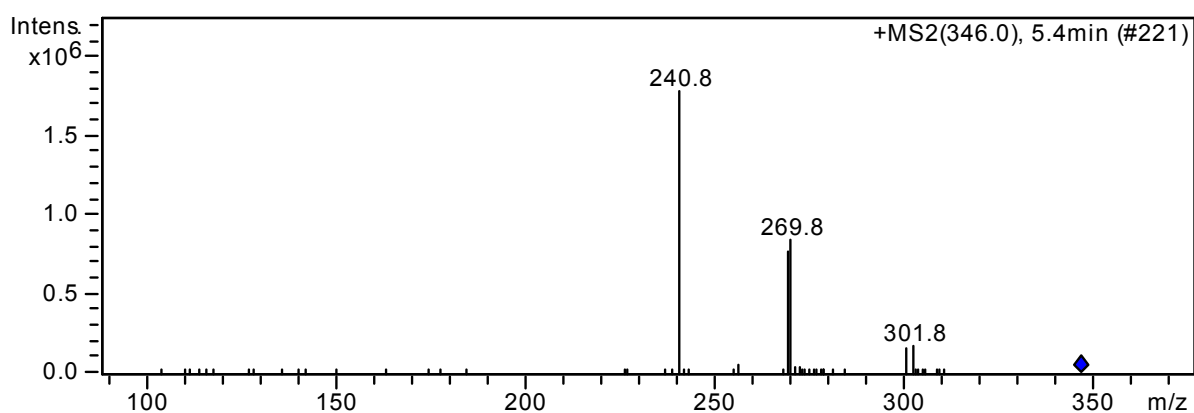

3b

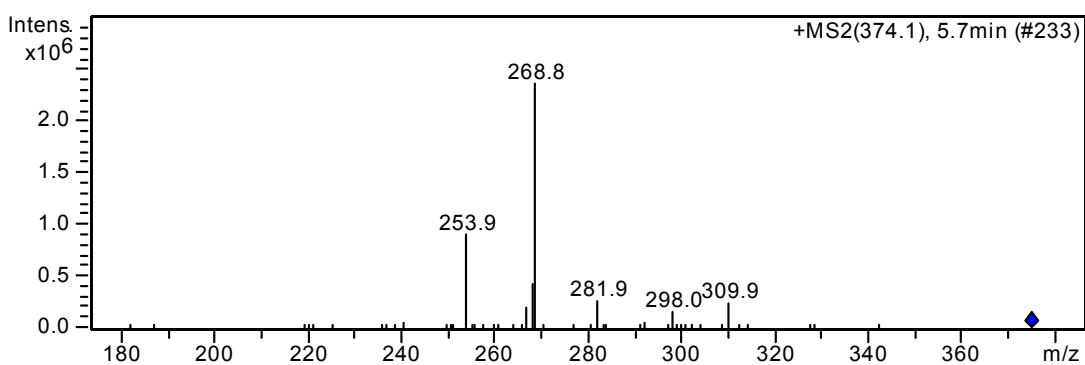

3c

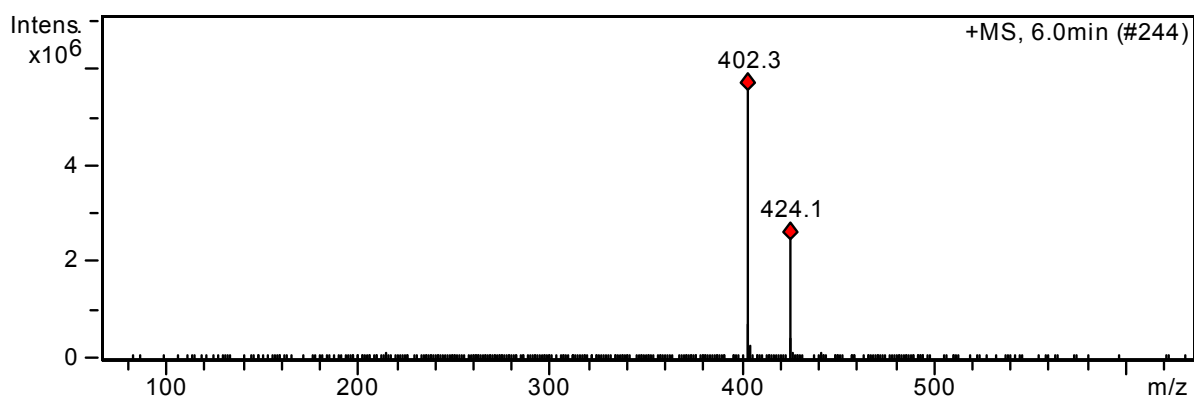

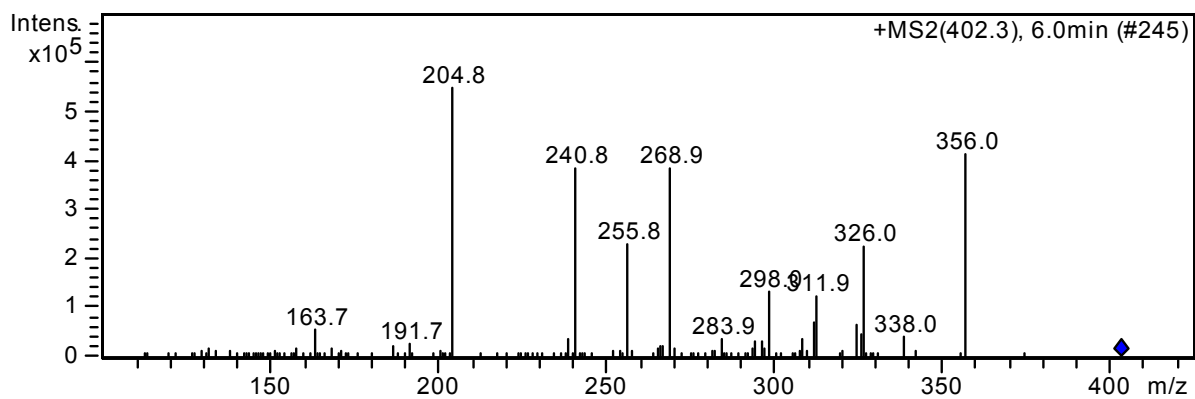

3d

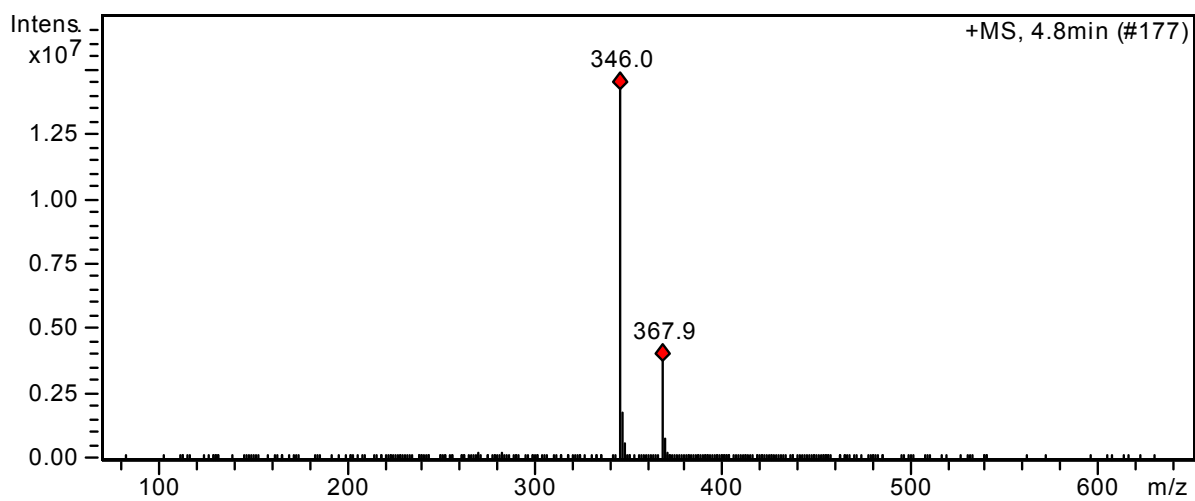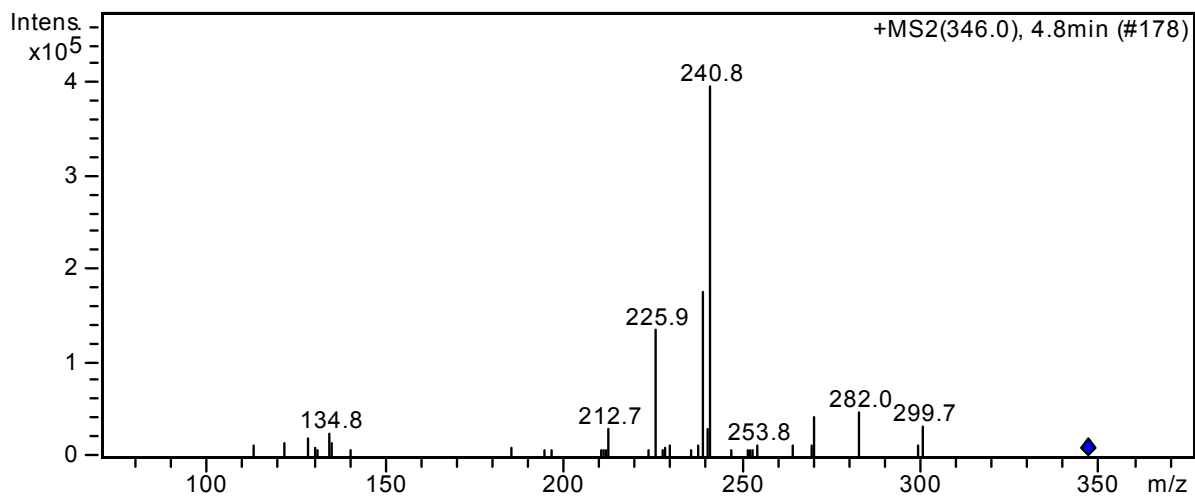

3e

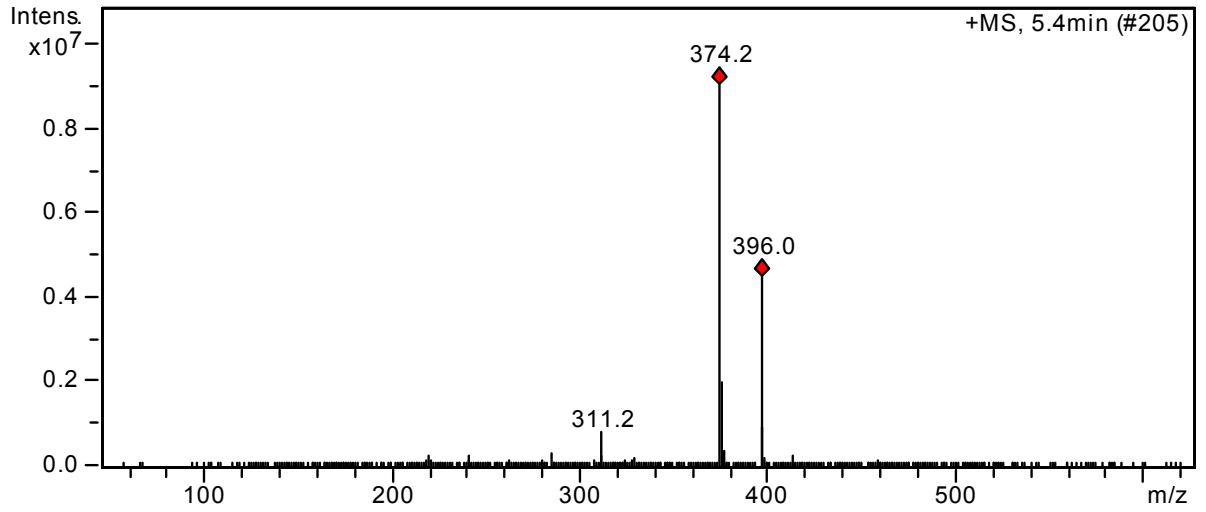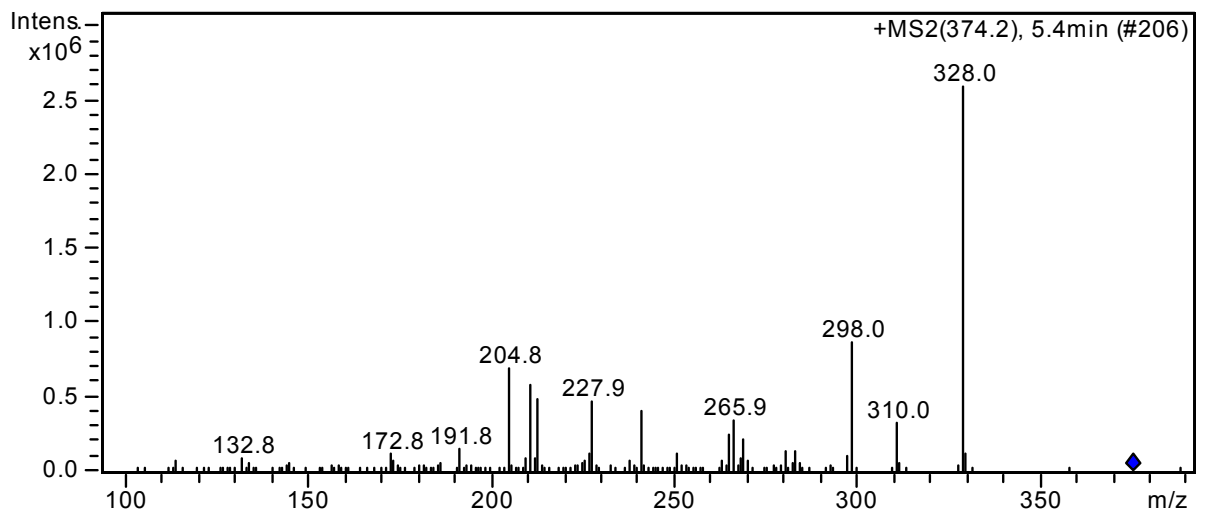

7a

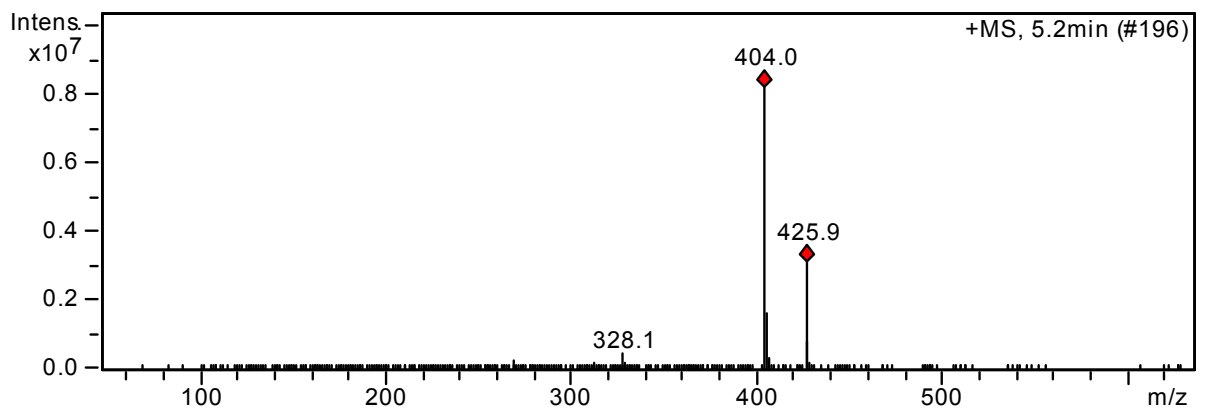

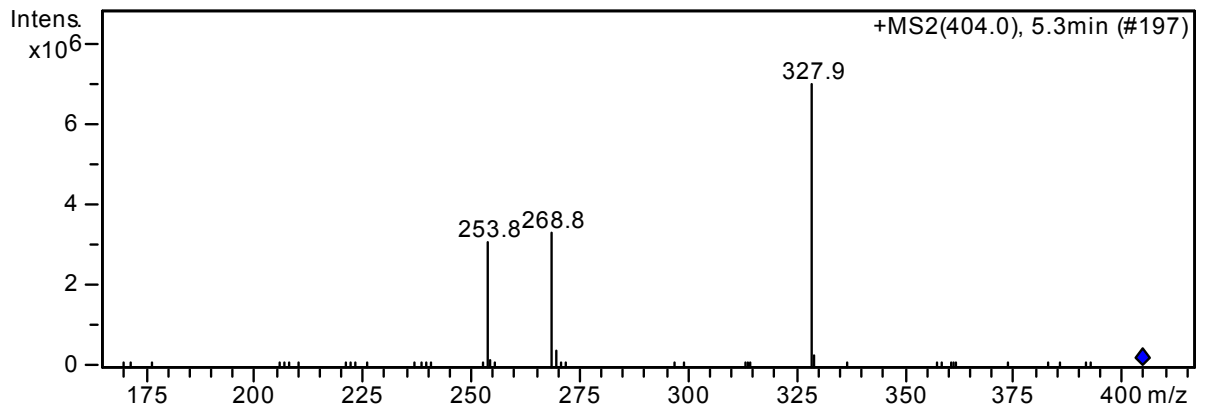

7b

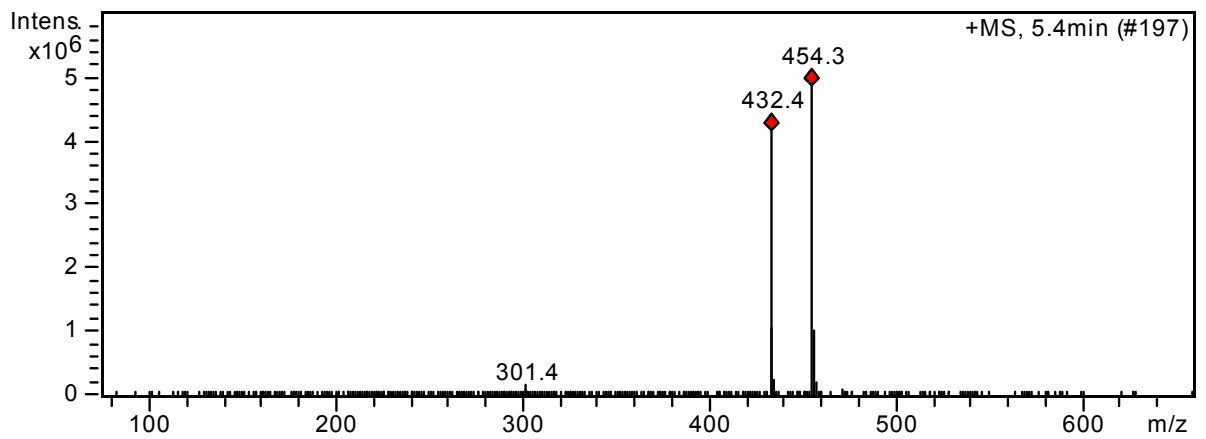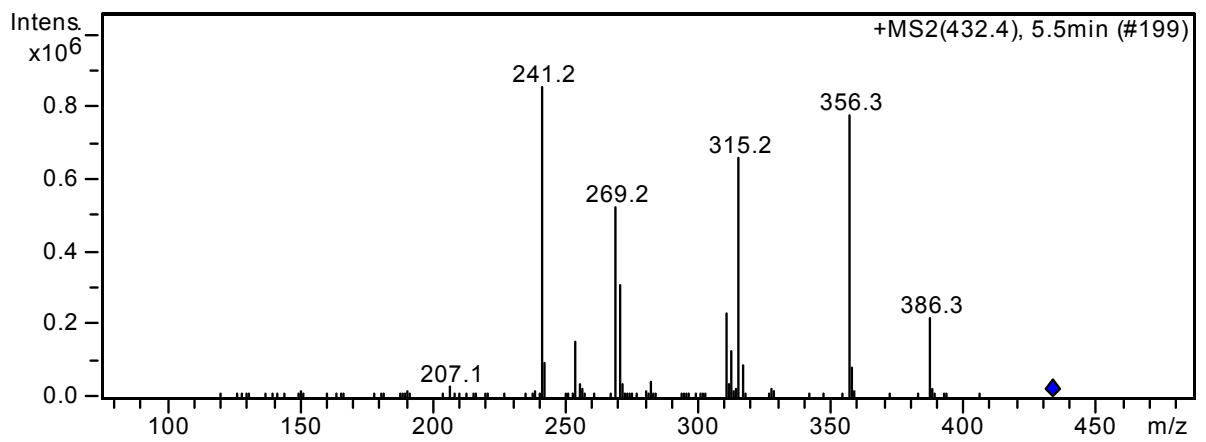

7c

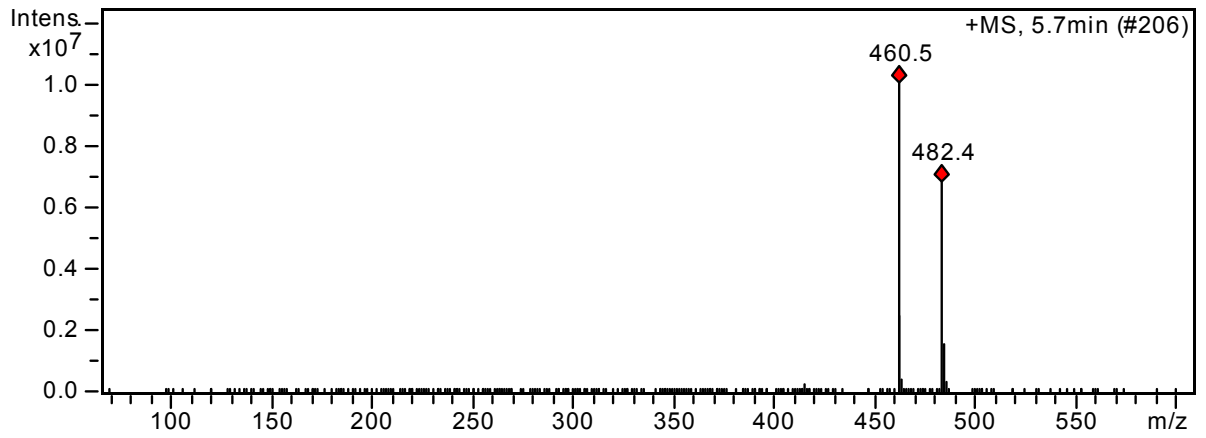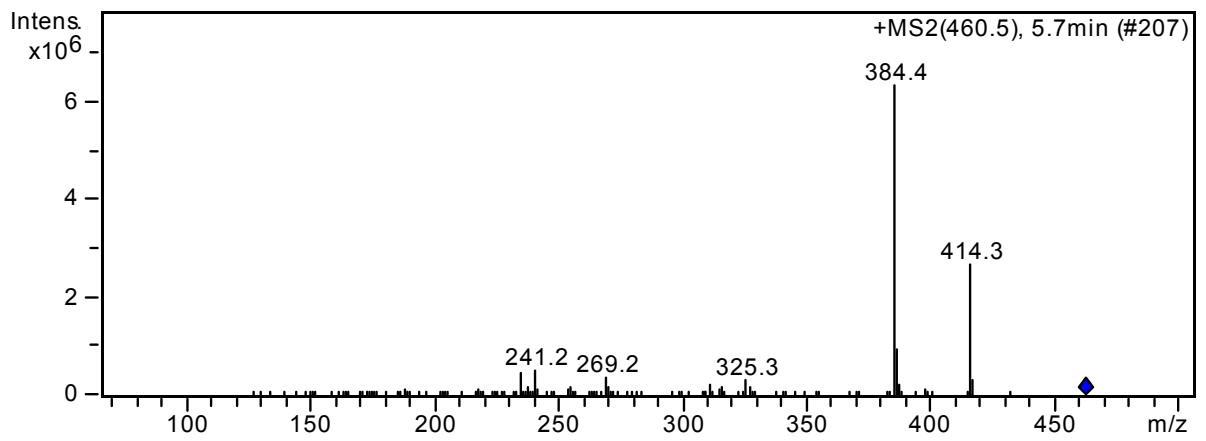

# <sup>1</sup>H NMR(600 MHz, DMSO-d<sub>6</sub>) of compounds 3a-7c

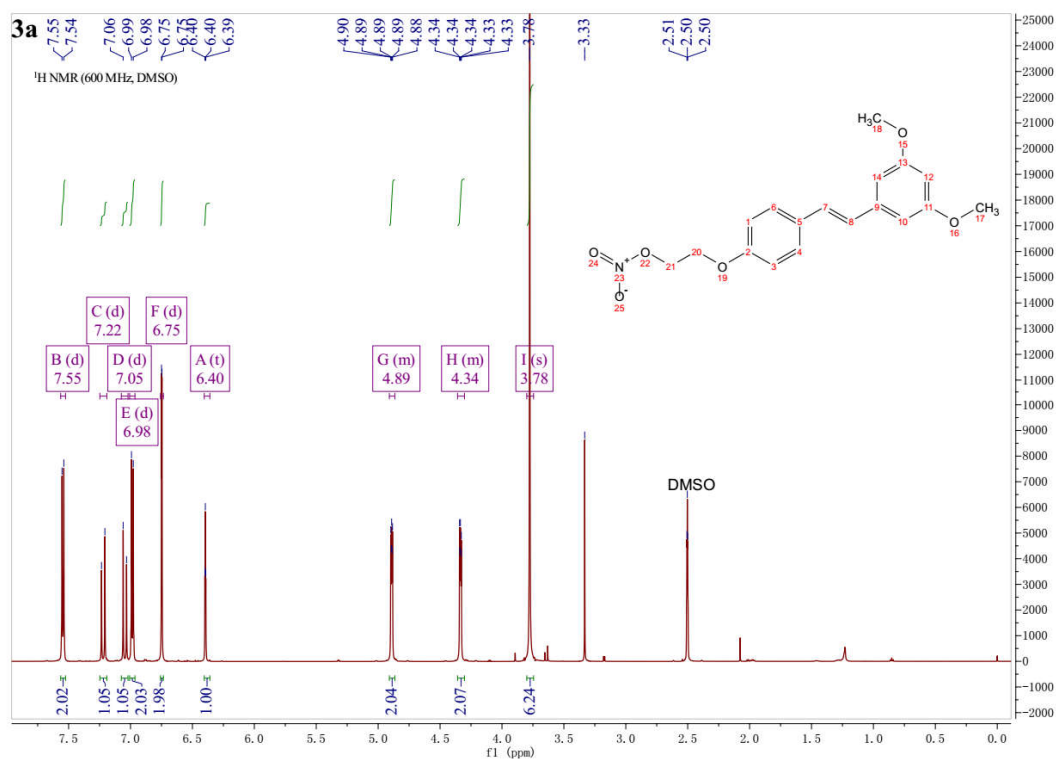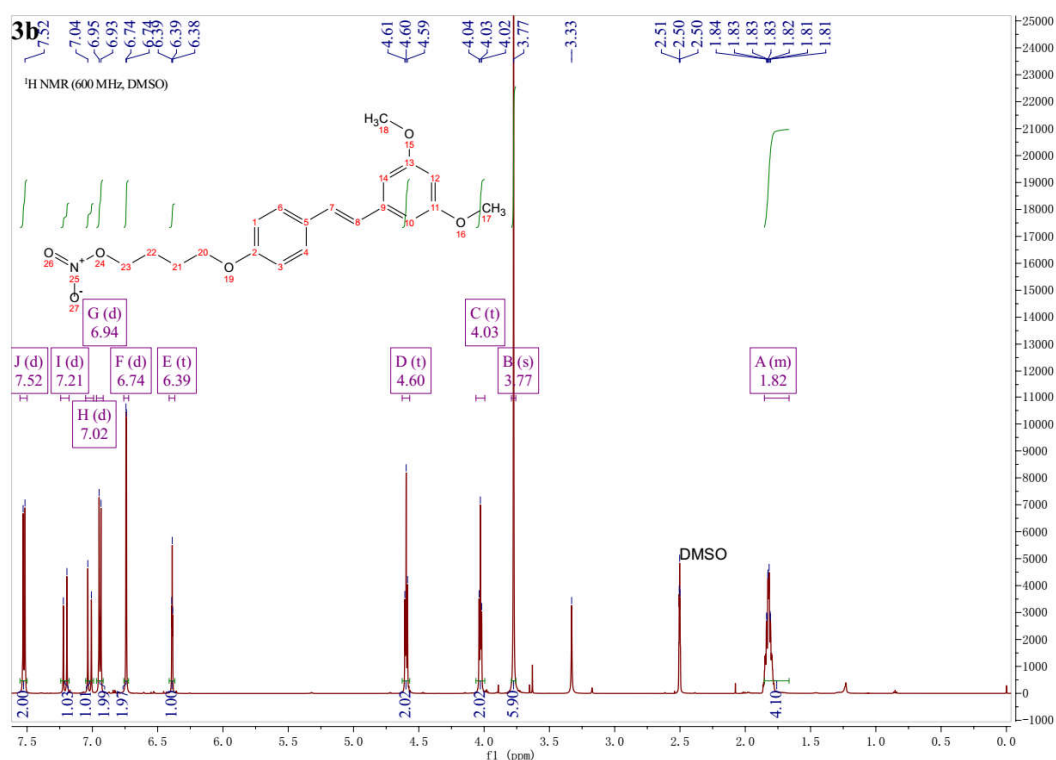

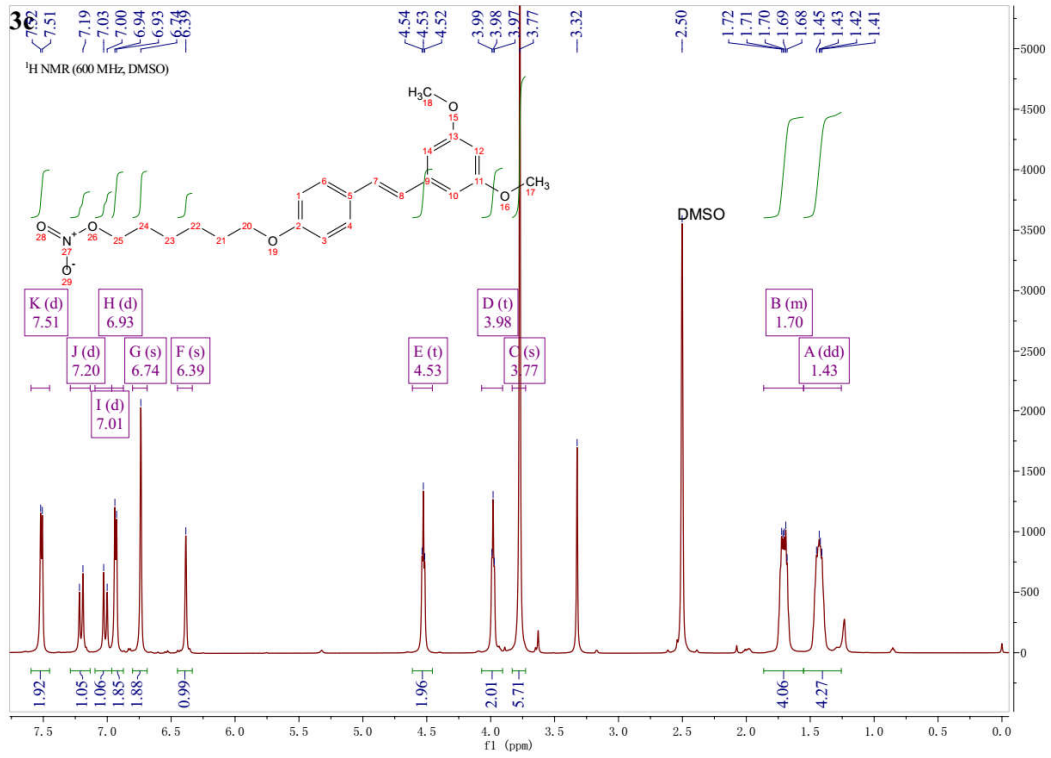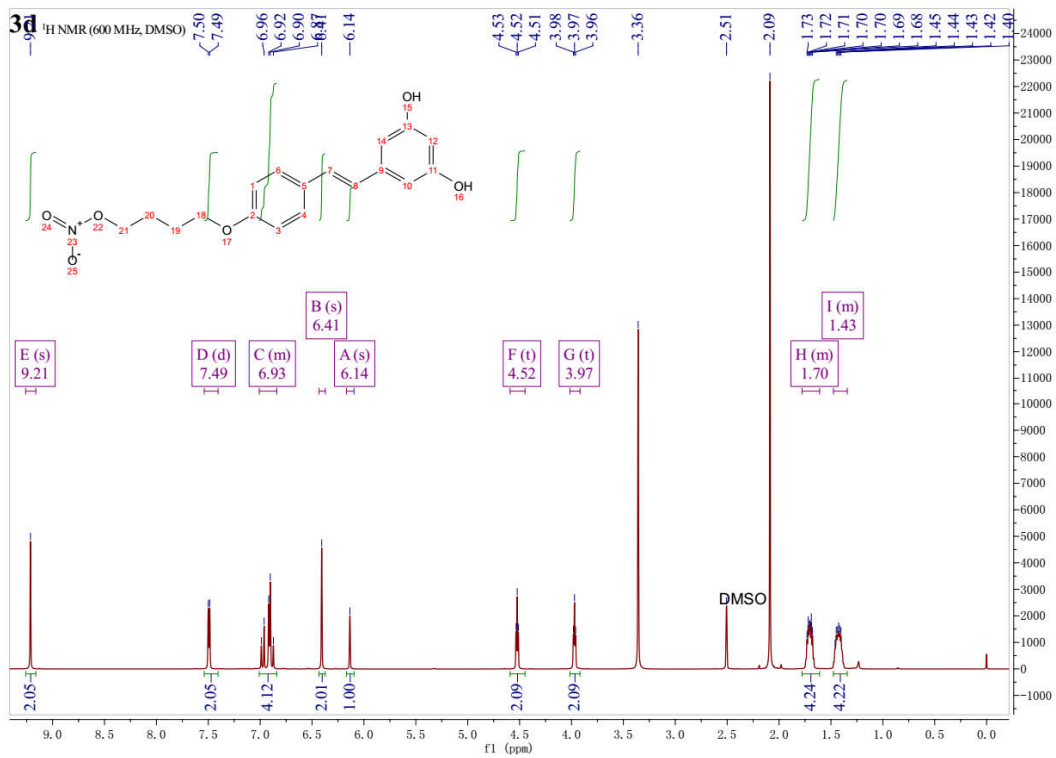



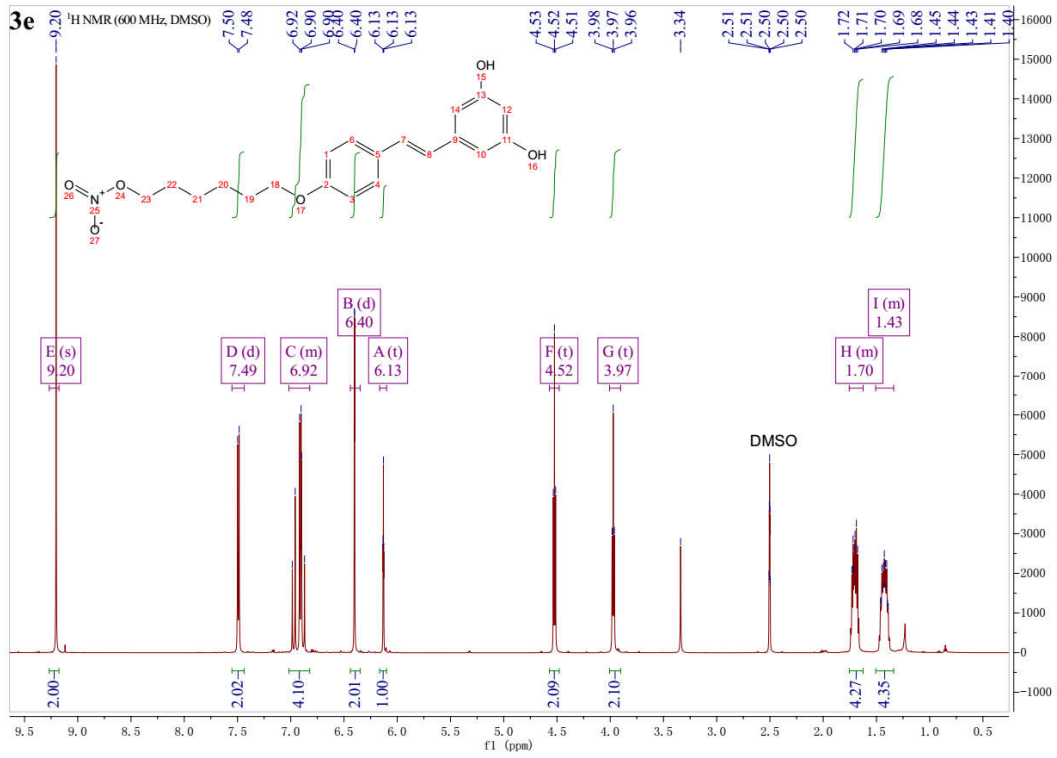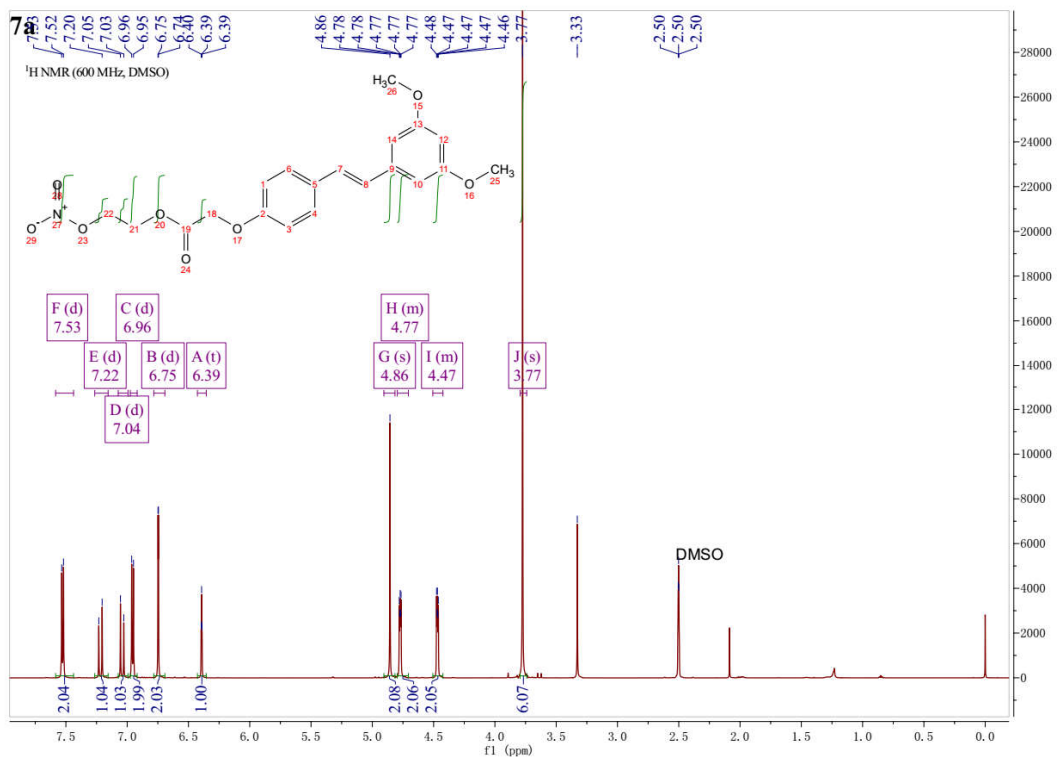

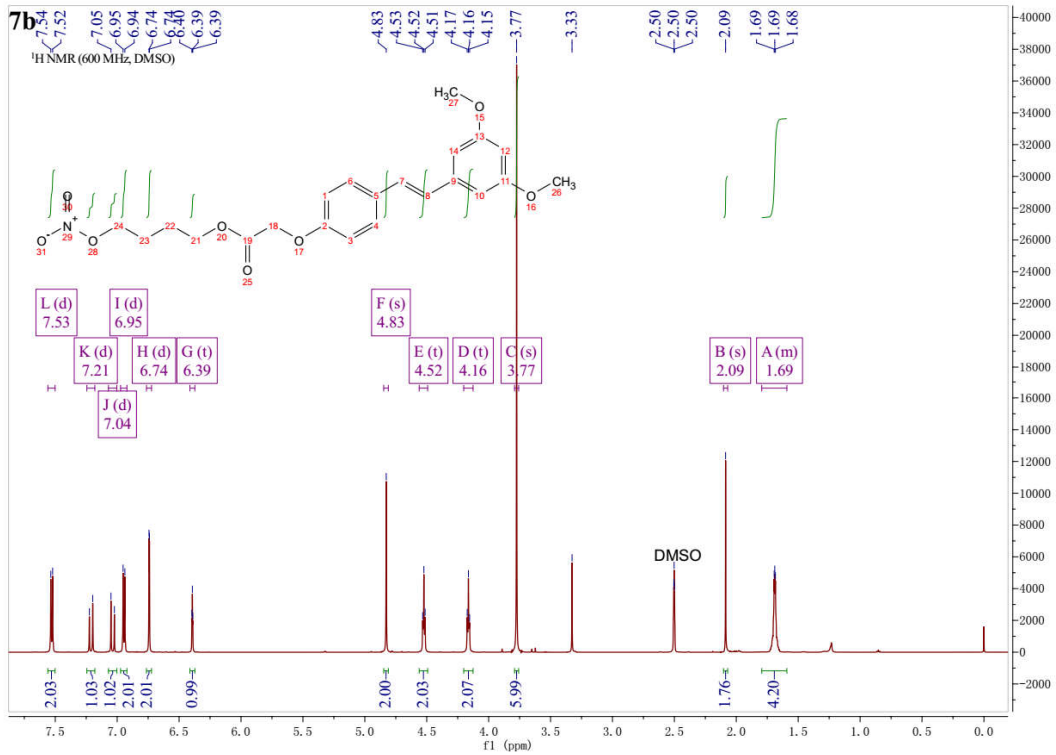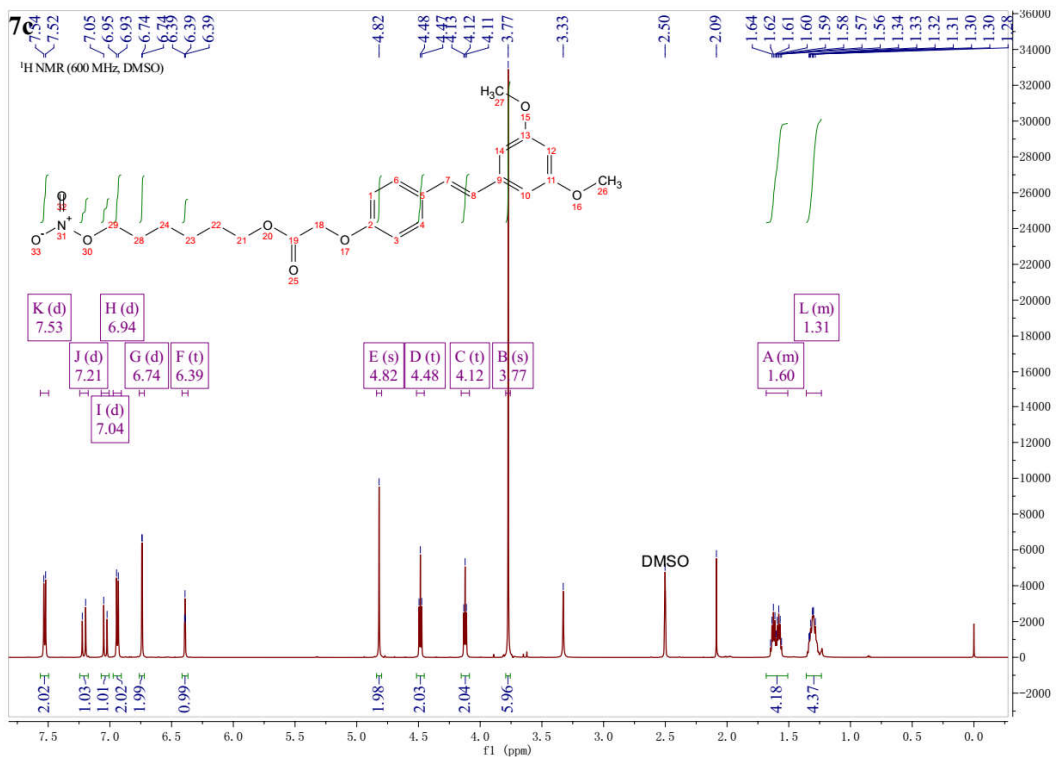

### <sup>13</sup>C NMR(150 MHz, DMSO-d<sub>6</sub>) of compounds 3a-7c

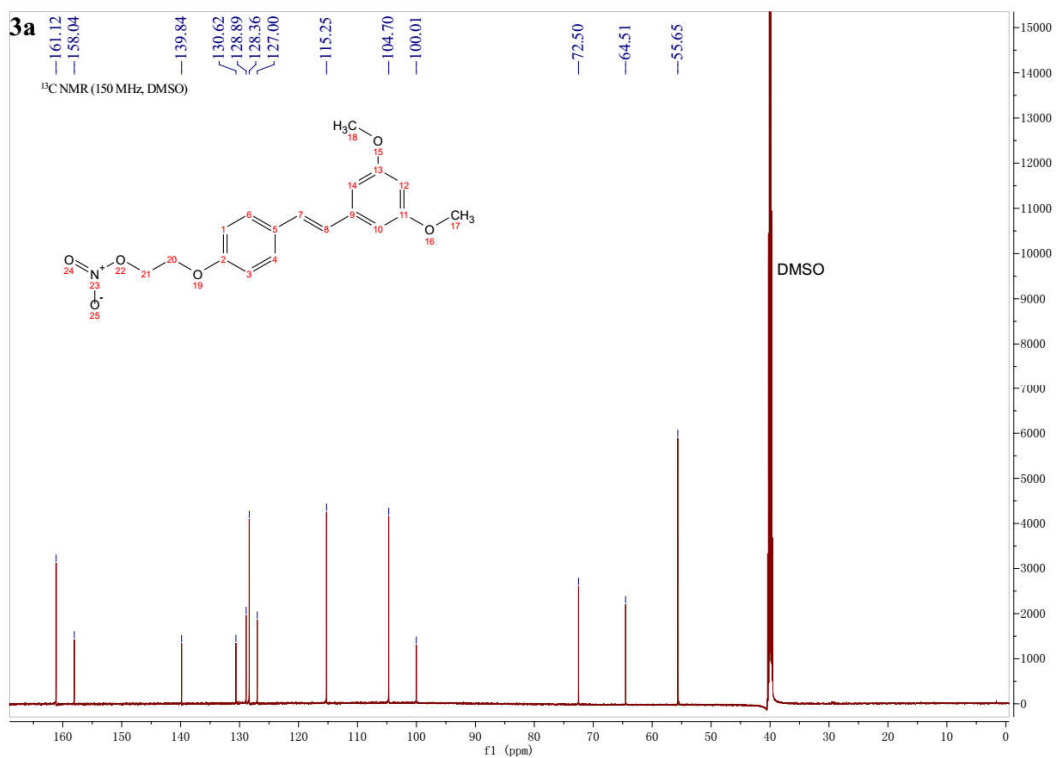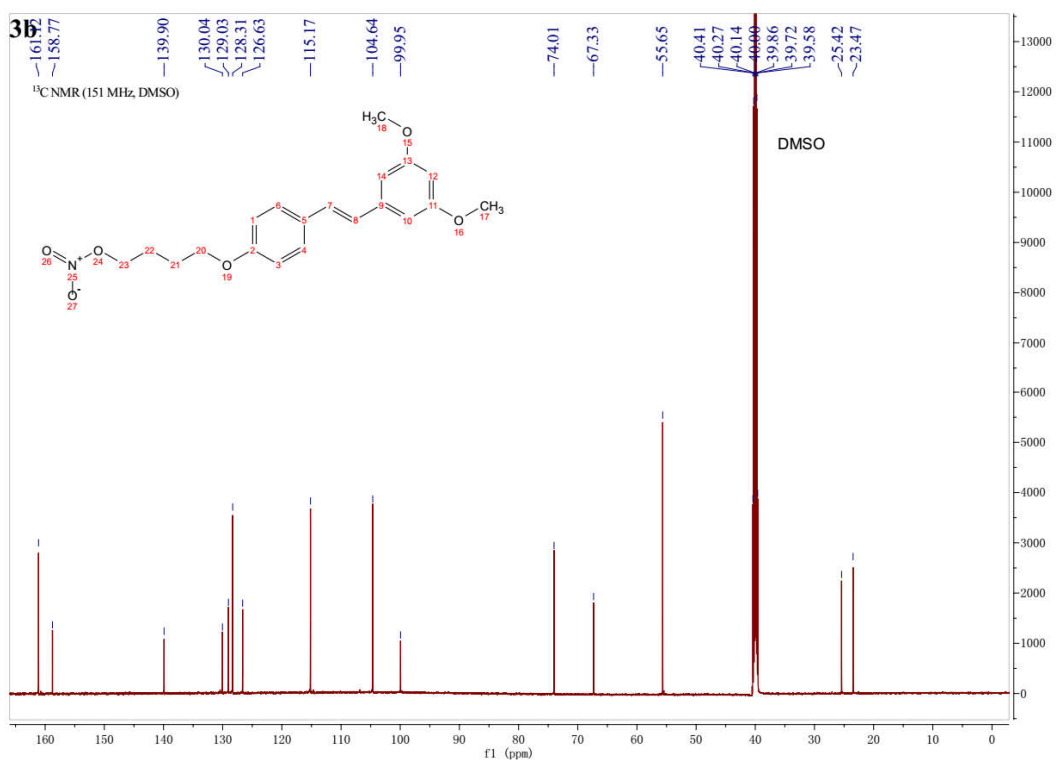

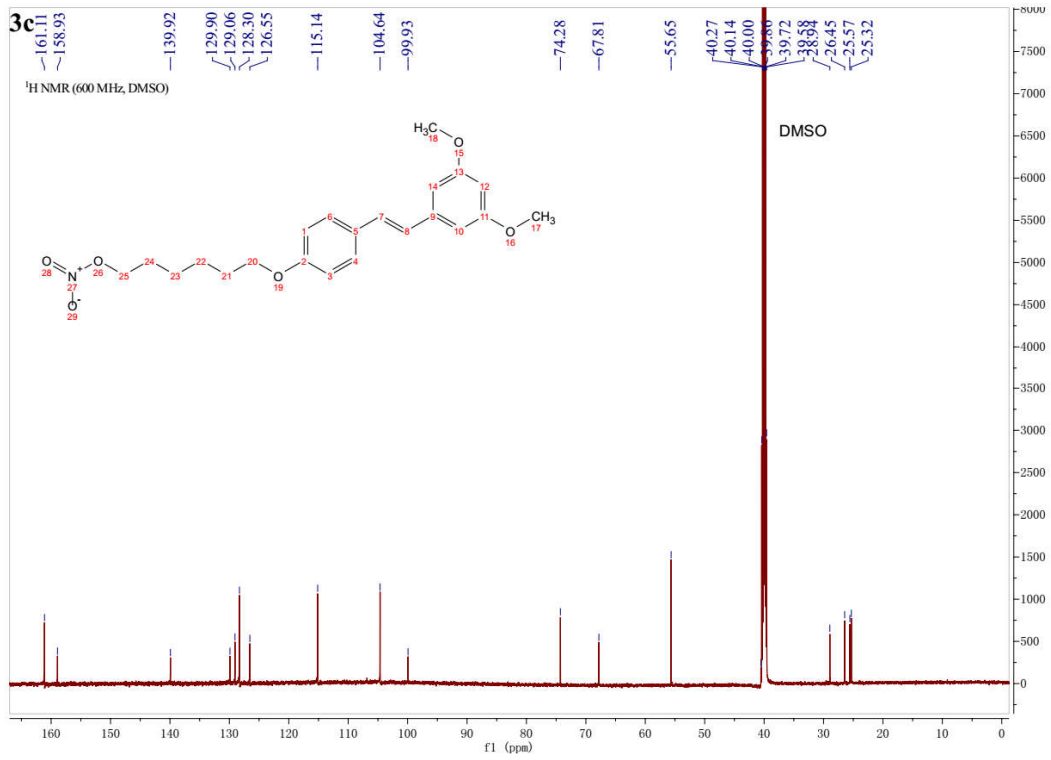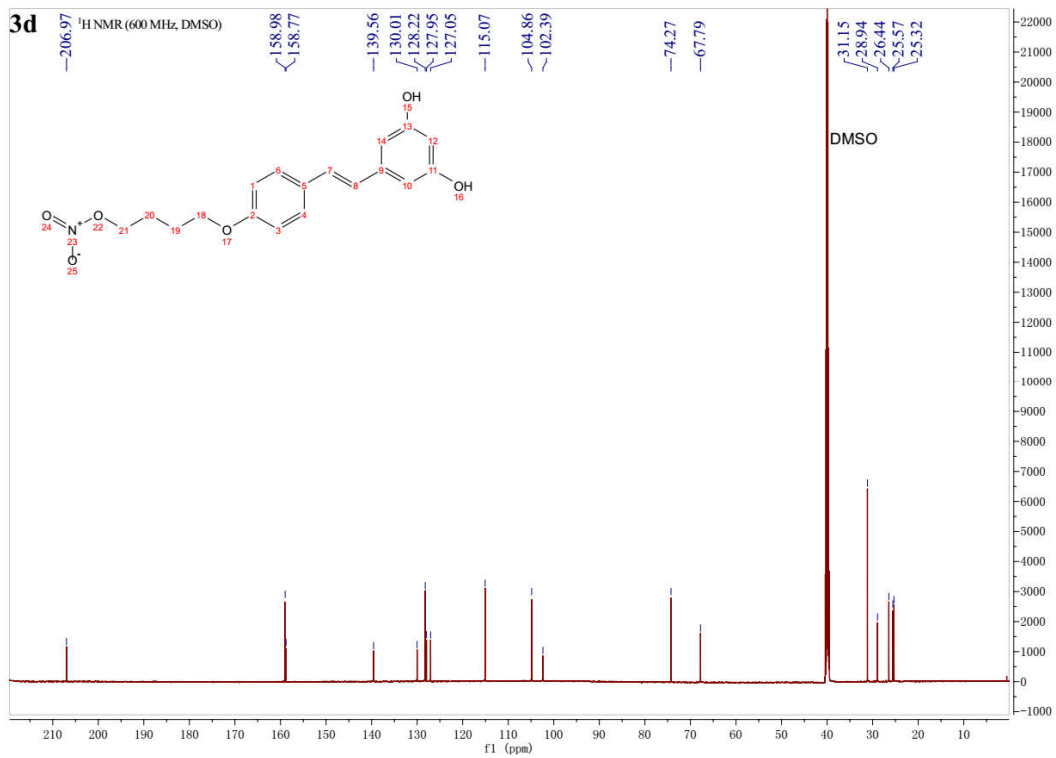

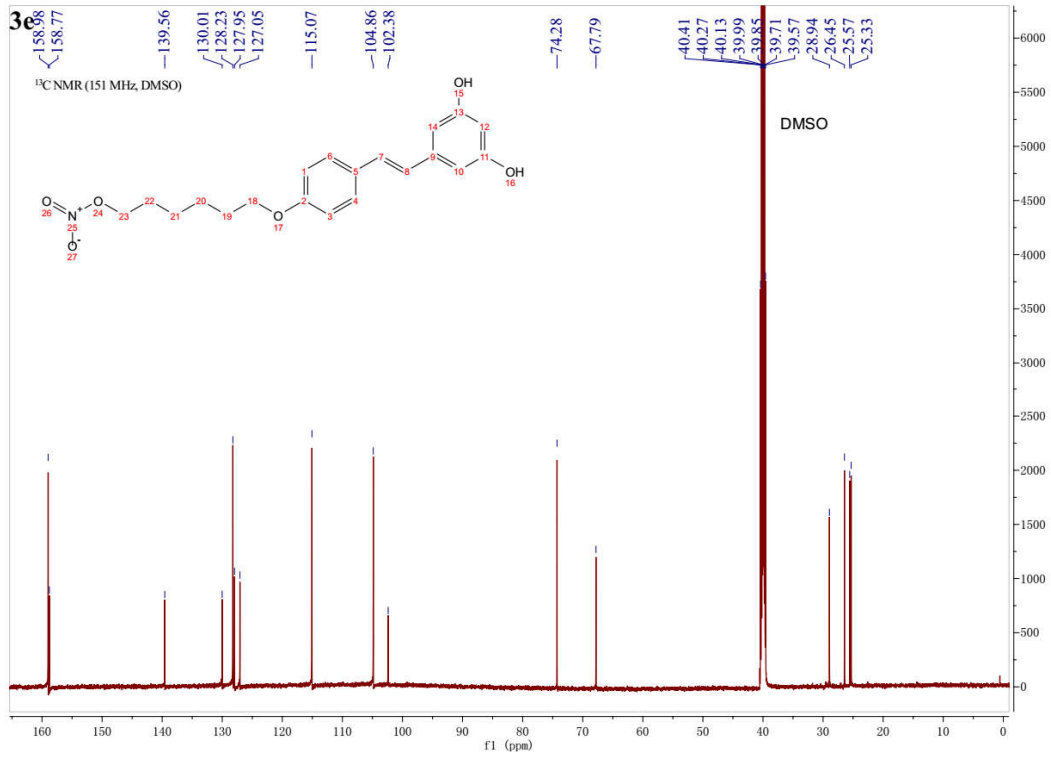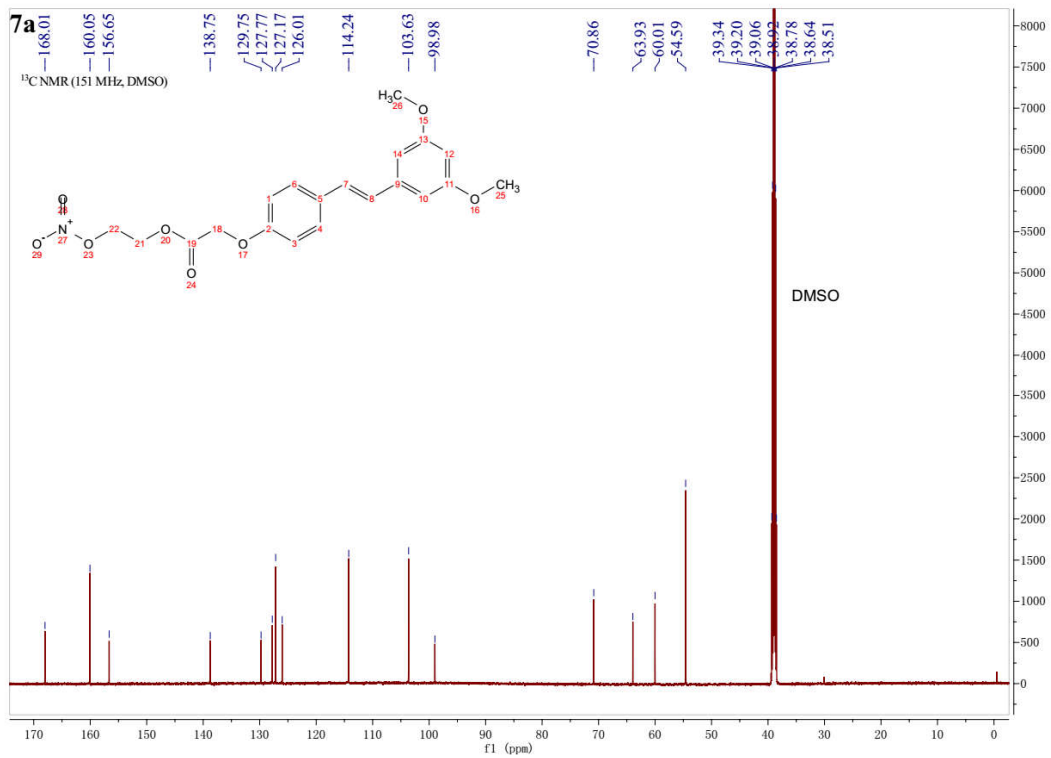

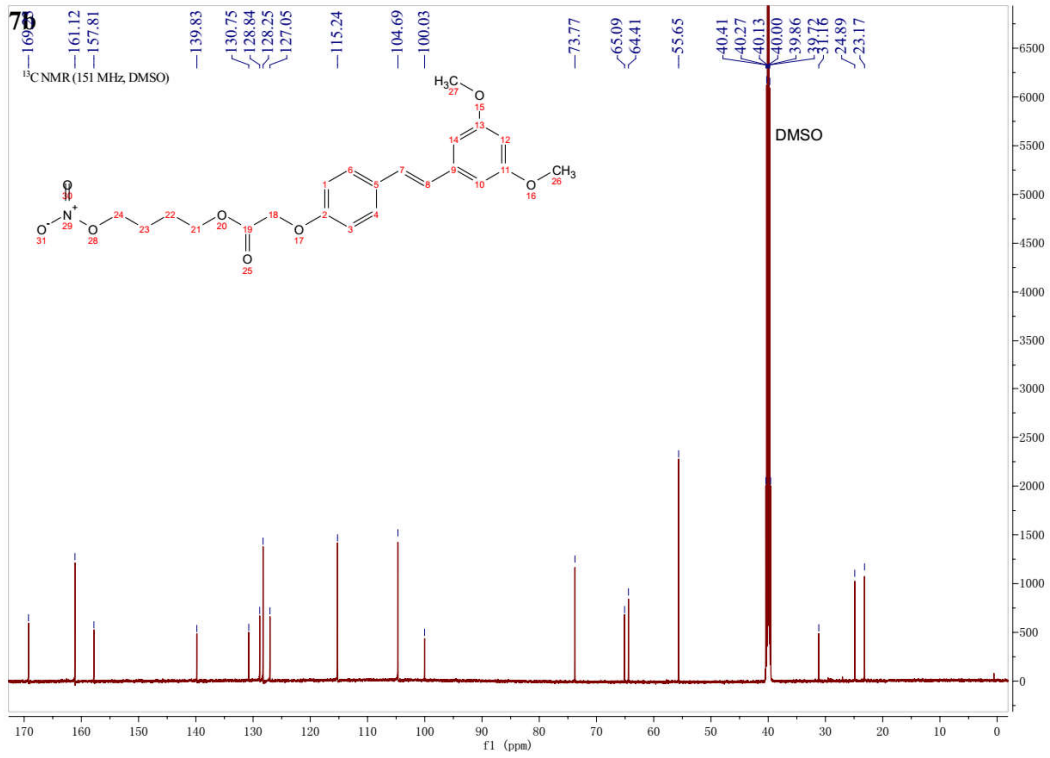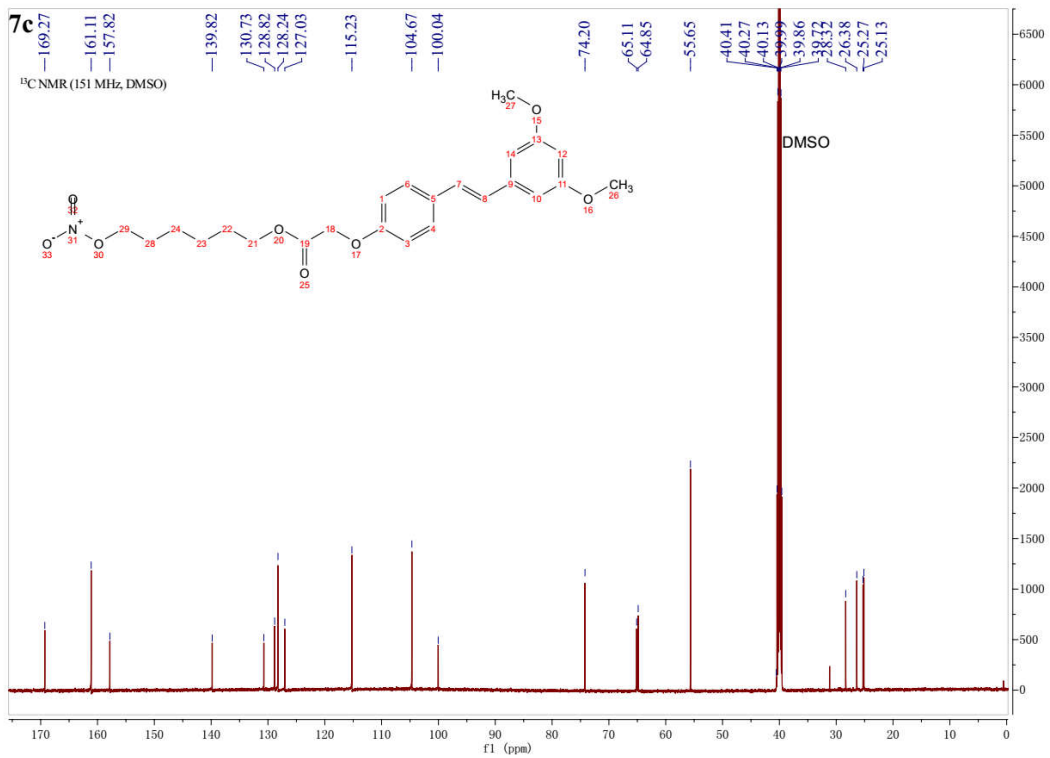

Supplement: IENZ_A_1425686_SM1431.pdf [file IENZ_A_1425686_SM1431.pdf]
